# Supplementary figures and images for: Differential effect on different immune subsets of neoadjuvant chemotherapy in patients with TNBC
Source: HighWire-hosted journal article supplement (doi:10.1136/jitc-2020-001261), 2020-11-01

## Supplemental Figure 2

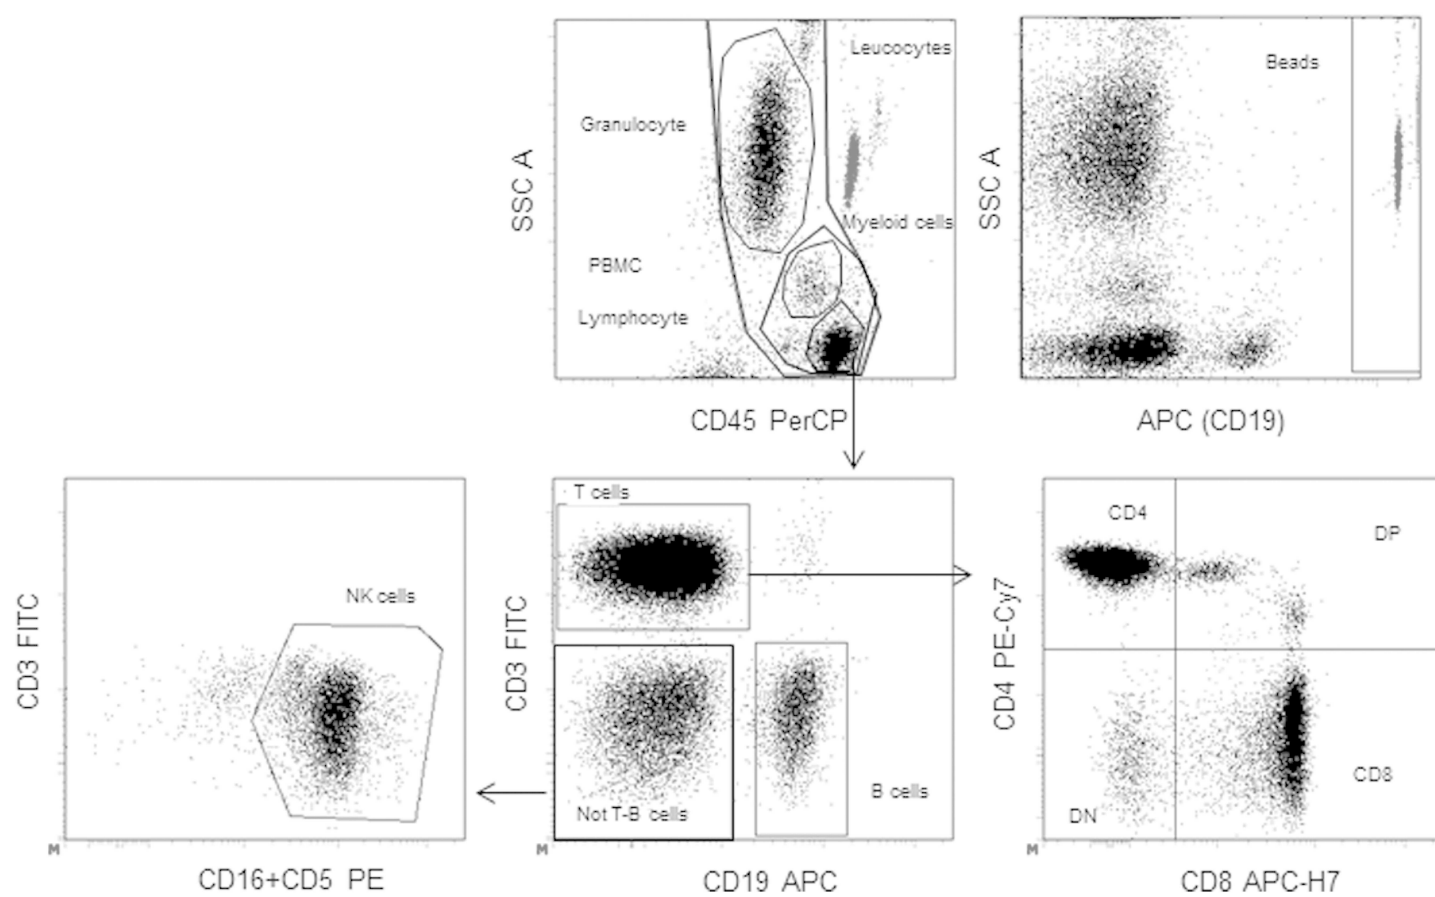

Supplement: jitc-2020-001261supp002_data_supplement.pdf [file jitc-2020-001261supp002_data_supplement.pdf]

## Supplemental Figure 3

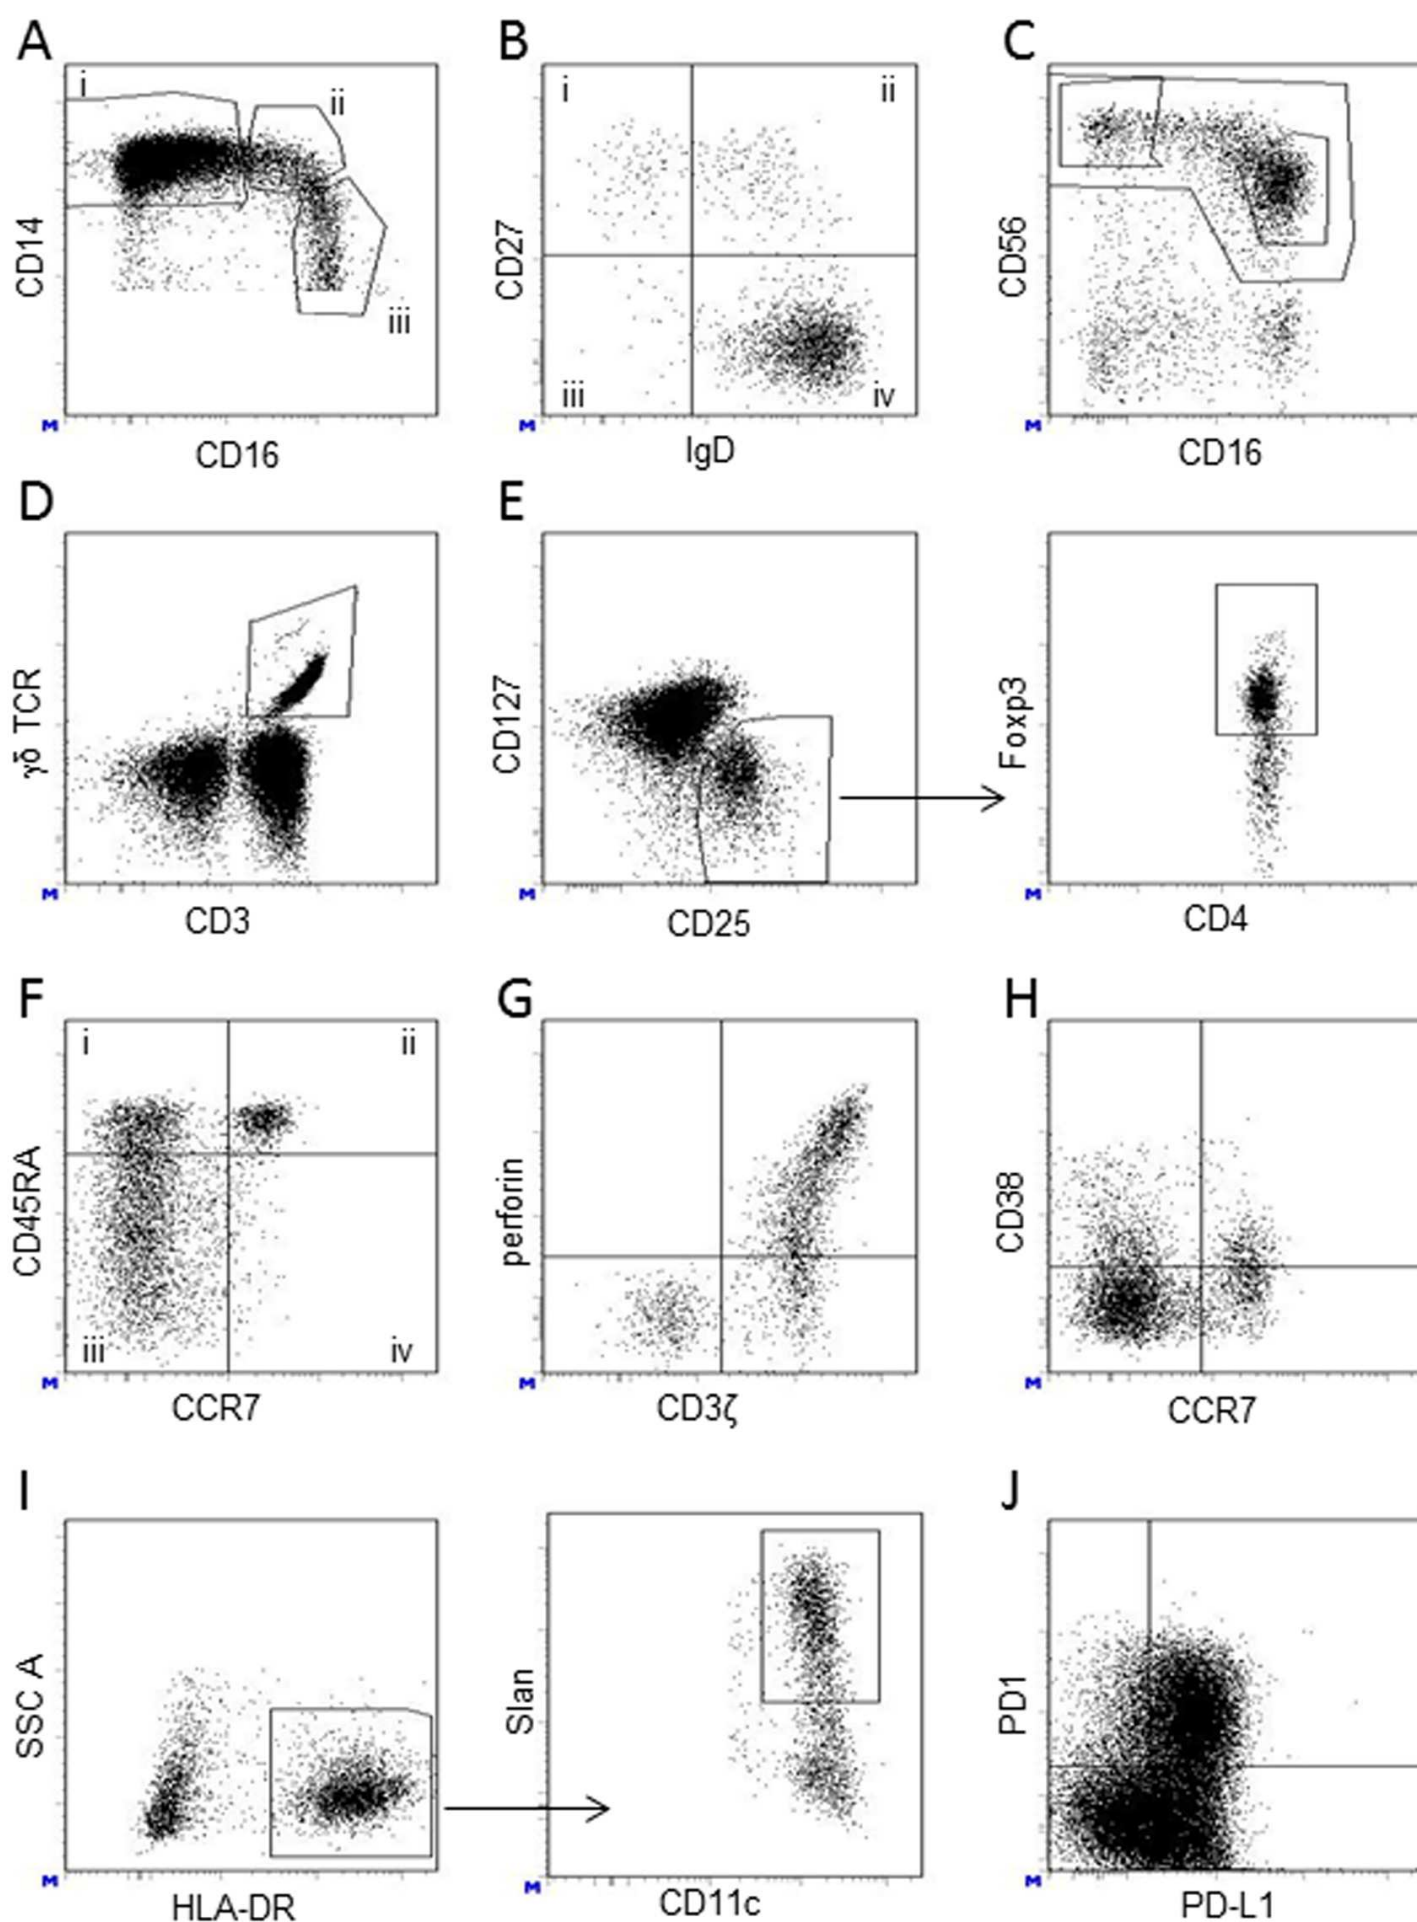

Supplement: jitc-2020-001261supp004_data_supplement.pdf [file jitc-2020-001261supp004_data_supplement.pdf]
